# Supplementary material for: Nanoelectronic biosensors based on CVD grown graphene
Source: Royal Society of Chemistry journal article supplement (doi:10.1039/c0nr00142b), 2010-01-01
Supplement: c0nr00142b.pdf [file c0nr00142b.pdf]

## Supplementary Data

### Nanoelectronic Biosensors Based on CVD Grown Graphene

Yinxi Huang,<sup>a†</sup> Xiaochen Dong,<sup>a,b†</sup> Yumeng Shi,<sup>b</sup> Chang Ming Li,<sup>a</sup> Lain-Jong Li,<sup>\*b</sup> and Peng Chen<sup>\*a</sup>

<sup>a</sup> School of Chemical and Biomedical Engineering, Nanyang Technological University, Singapore 637457

<sup>b</sup> School of Materials Science and Engineering, Nanyang Technological University, Singapore 639798

<sup>†</sup> These authors contribute equally to the work.

Correspondence: [chenpeng@ntu.edu.sg](mailto:chenpeng@ntu.edu.sg) or [ljli@ntu.edu.sg](mailto:ljli@ntu.edu.sg)

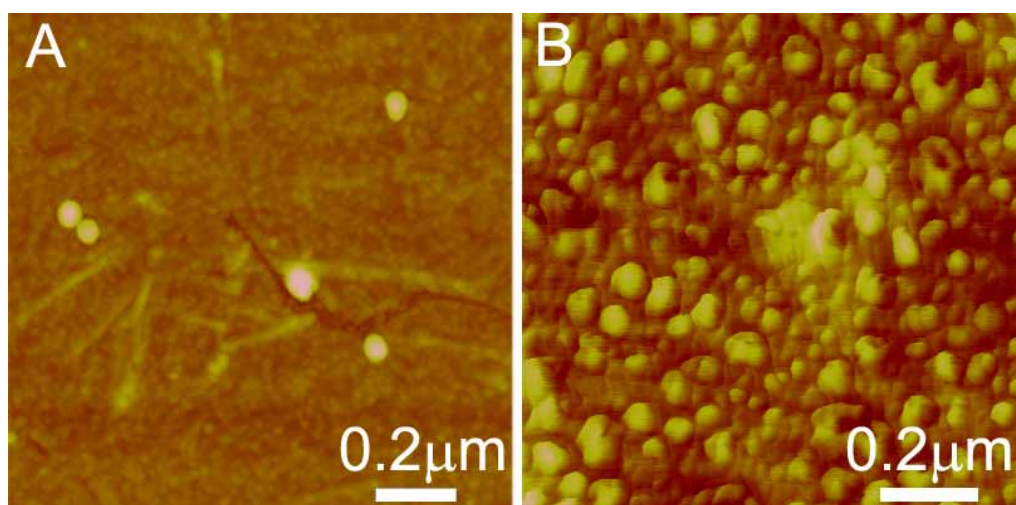

**Figure S1.** AFM images of graphene film before (A) and after (B) functionalization with glucose oxidase.

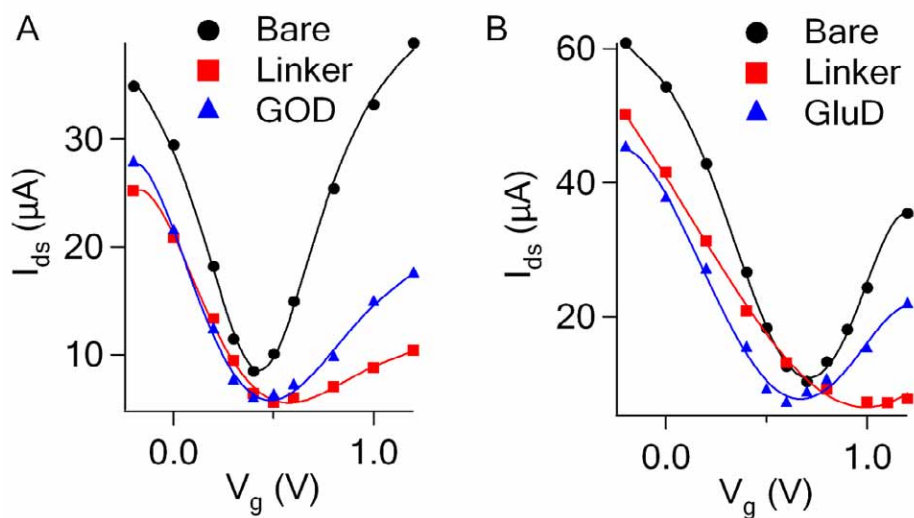

**Figure S2.** (A) Transfer curves of bare graphene FET, graphene FET functionalized with linker molecule, graphene FET functionalized with GOD. (B) A. transfer curve of bare graphene FET, graphene FET functionalized with linker molecule, graphene FET functionalized with GluD.

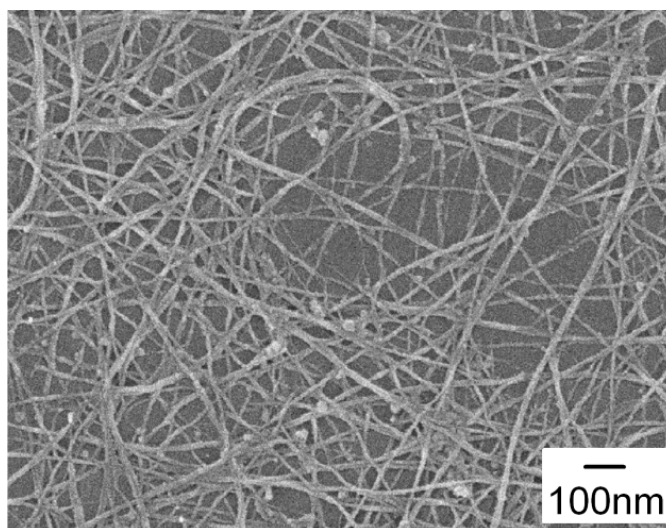

**Figure S3.** SEM image of SWNT-network prepared using phase-separation facilitated self-assembly of carboxylated-SWNTs (Carbon Solution) as previously reported.<sup>1</sup>

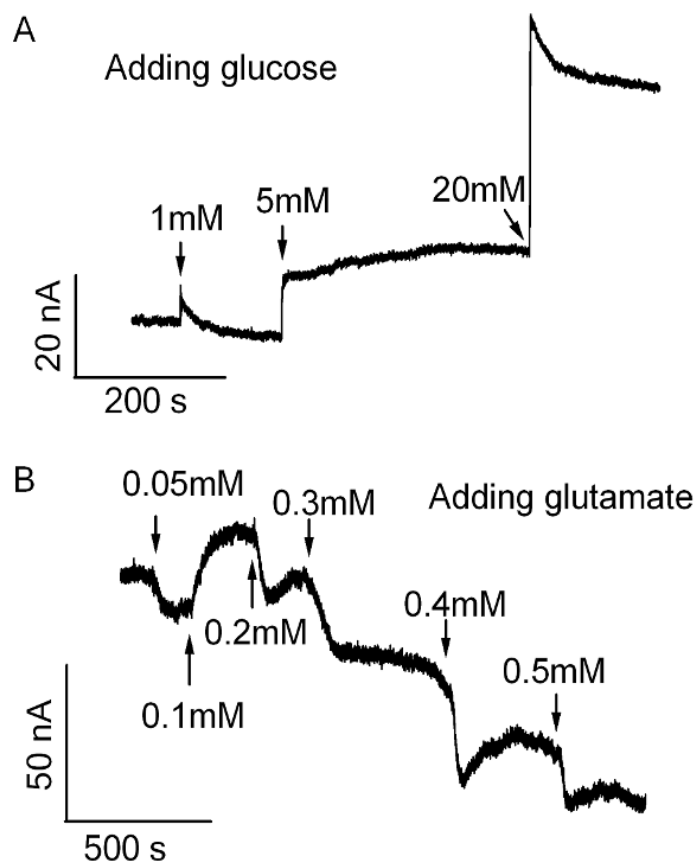

**Figure S4.** Current response of enzyme-functionalized SWNT-network FET with addition of glucose (A) and glutamate (B). Similar to graphene FET, SWNT-network FET also responded to addition of glucose with current increase, but with lower sensitivity. Addition of glutamate caused inconsistent responses of SWNT-network (in all samples) for unknown reasons. The observation may be partly attributable to the ineffectiveness in enzyme functionalization and low sensitivity of the device.

1. Y. X. Huang, H. G. Sudibya, D. L. Fu, R. H. Xue, X. C. Dong, L. J. Li, and P. Chen, *Biosensors & Bioelectronics*, 2009, **24**, 2716.
